# Supplementary material for: MicroRNA-200c restoration reveals a cytokine profile to enhance M1 macrophage polarization in breast cancer
Source: PubMed Central journal article supplement (PMC8160264; doi:10.1038/s41523-021-00273-1), 2021-05-27
Supplement: 41523_2021_273_MOESM1_ESM.pdf [file 41523_2021_273_MOESM1_ESM.pdf]

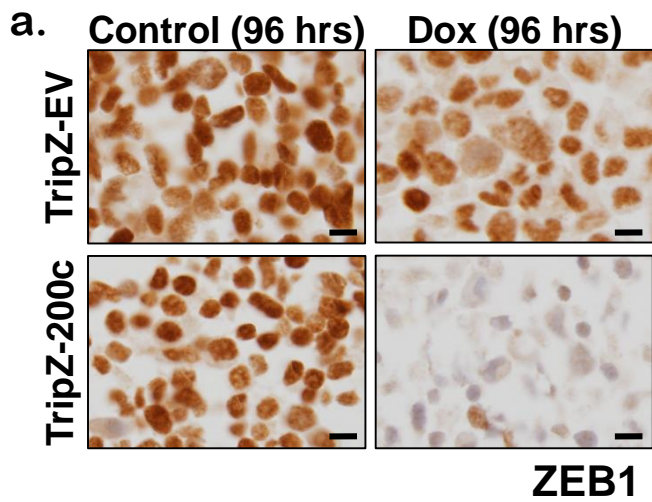

**b.** Genes Downregulated by miR-200c

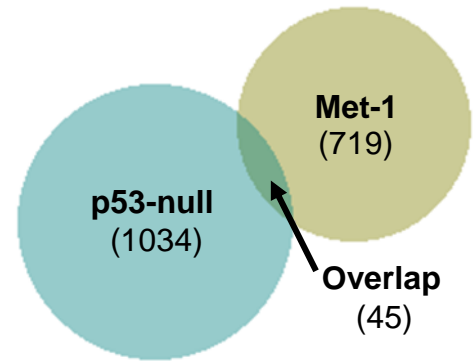

**c.** Genes Downregulated by miR-200c

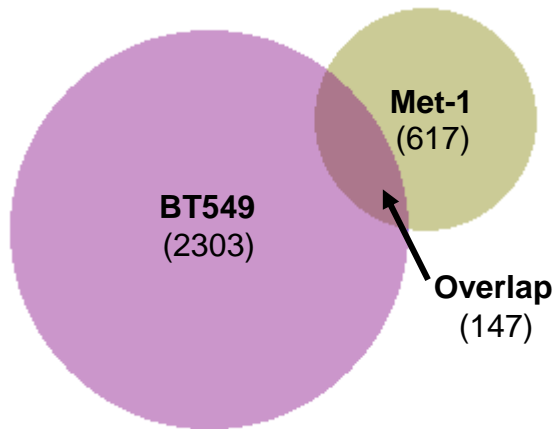

**Supplementary Figure 1.** **a.** Met-1 TripZ-EV and Met-1 TripZ-200c cells were treated with 1.0  $\mu\text{g}/\text{mL}$  Dox for 96 hours and cells were pelleted and FFPE. Shown are representative images for staining of ZEB1, 40x, scale bar = 10  $\mu\text{M}$ . **b-c.** Genes downregulated by miR-200c in Met-1 TripZ-200c cells were compared to genes downregulated by miR-200c in a p53-null claudin-low mammary tumor model (**b**) or genes downregulated by miR-200c in human TNBC BT549 cells (**c**). Gene lists can be seen in Supplementary Tables 5 and 6.

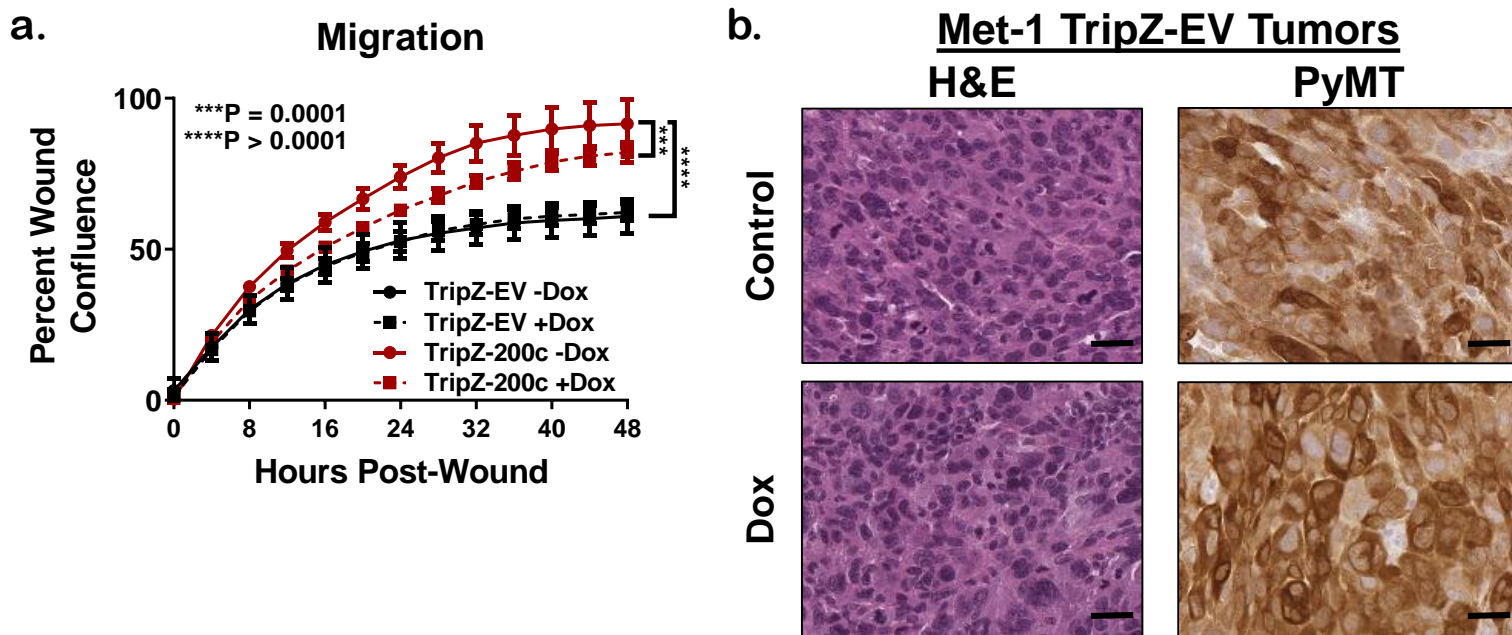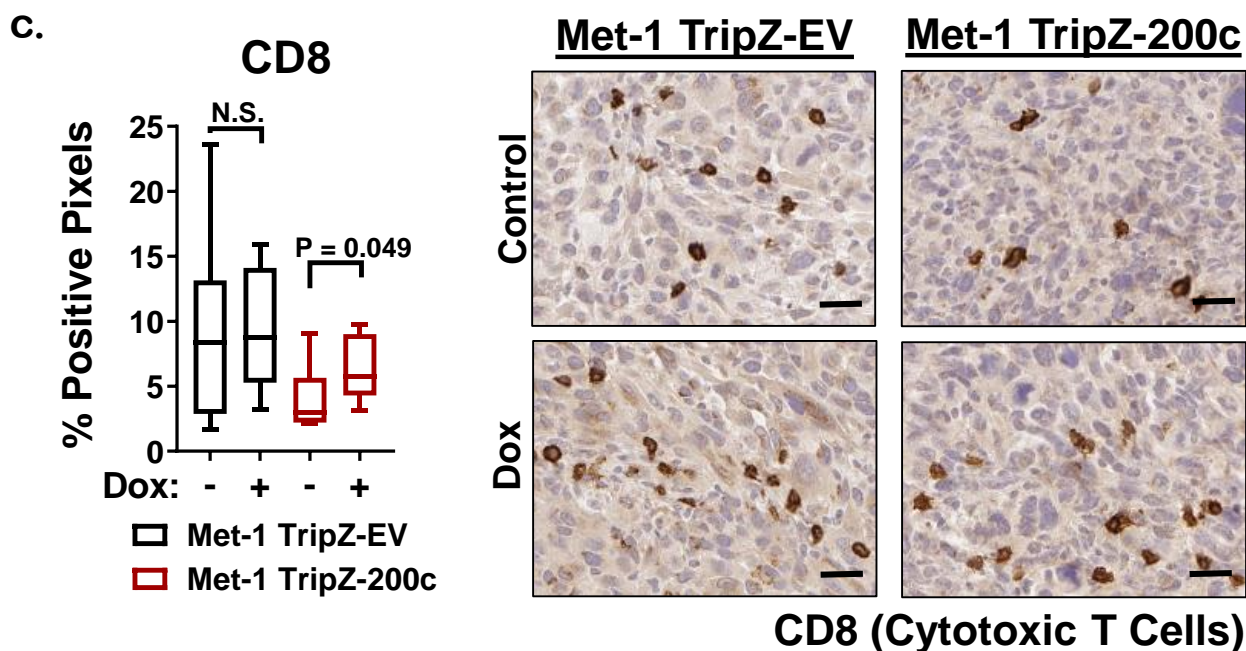

**Supplementary Figure 2. a.** Migration of Met-1 TripZ-EV and Met-1 TripZ-200c cells treated with 1.0  $\mu\text{g}/\text{mL}$  Dox for 48 hours was determined using the IncuCyte imaging system, shown is the mean percent wound confluence for two experiments  $\pm$  s.d., N = 20, two-way ANOVA. **b.** Met-1 TripZ-EV tumors were analyzed by staining for Hematoxylin & Eosin (H&E) and PyMT. Shown is a representative image for each group, 10x, scale bar = 30  $\mu\text{m}$ . **c.** IHC for CD8 was conducted on Met-1 TripZ-EV and Met-1 TripZ-200c tumors. Quantification was done on the entirety of each tumor using the Aperio microscope and ImageScope software. Percent pixels are presented as a box plot with the center line representing the median, the box representing the 25<sup>th</sup> and 75<sup>th</sup> percentiles and the whiskers representing the minimum and maximum, N = 8-12, Student's unpaired two-tailed T-test (left). Representative images are shown (right), 10x, scale bar = 30  $\mu\text{m}$ .

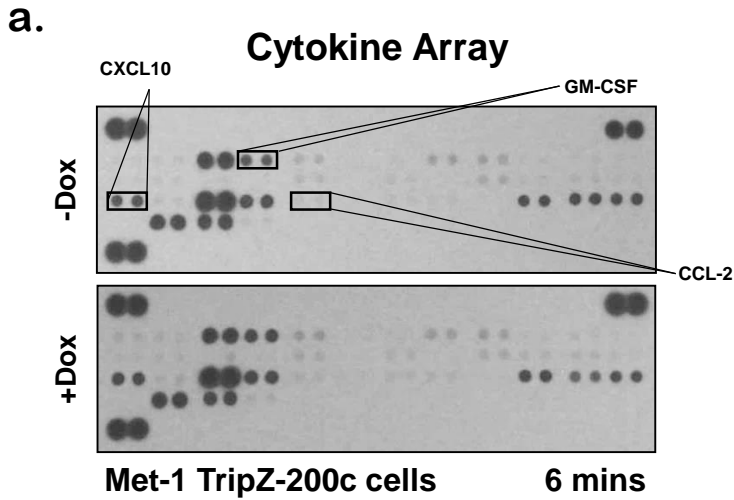

**b.**

**Cytokine Array in Met-1 TripZ-200c Cells**

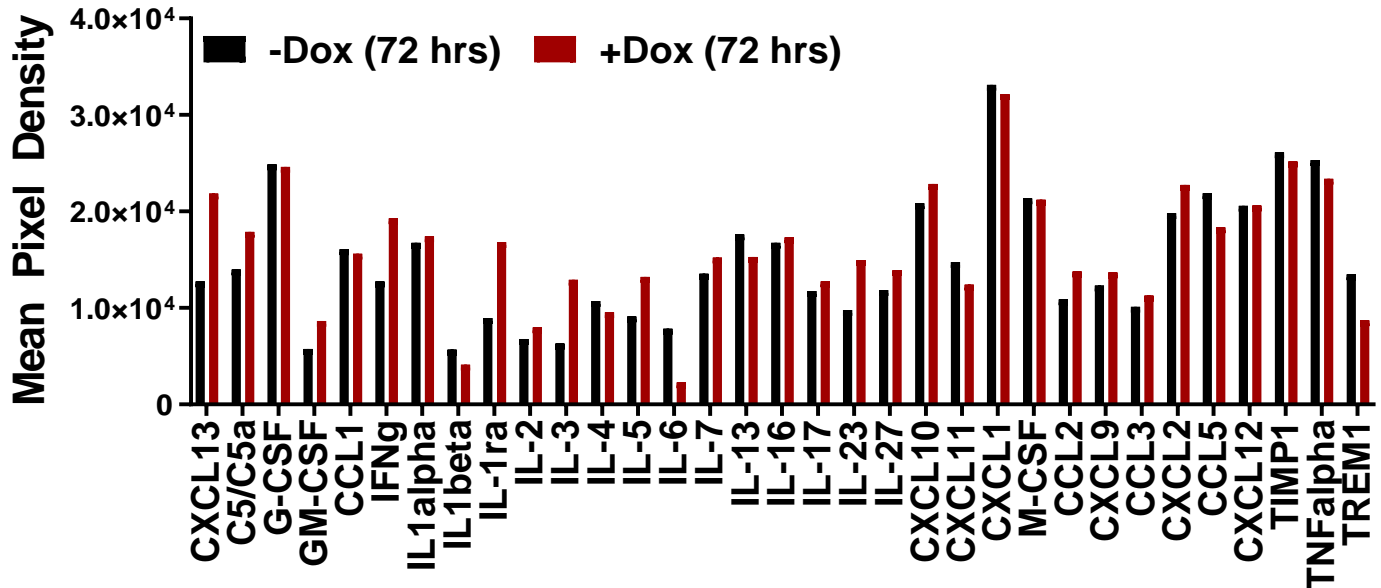

**Supplementary Figure 3. a-b.** Met-1 TripZ-200c cells were treated  $\pm$  1.0  $\mu$ g/mL Dox for 72 hours to restore miR-200c. At this time point, conditioned medium from cells was harvested and analyzed via cytokine array. A representative image for a 6 minute exposure is shown (a). Quantification of mean pixel density for all cytokines detected was completed using ImageJ and is shown (b).

## Cytokine Multiplex in BT549 TripZ-200c Cells

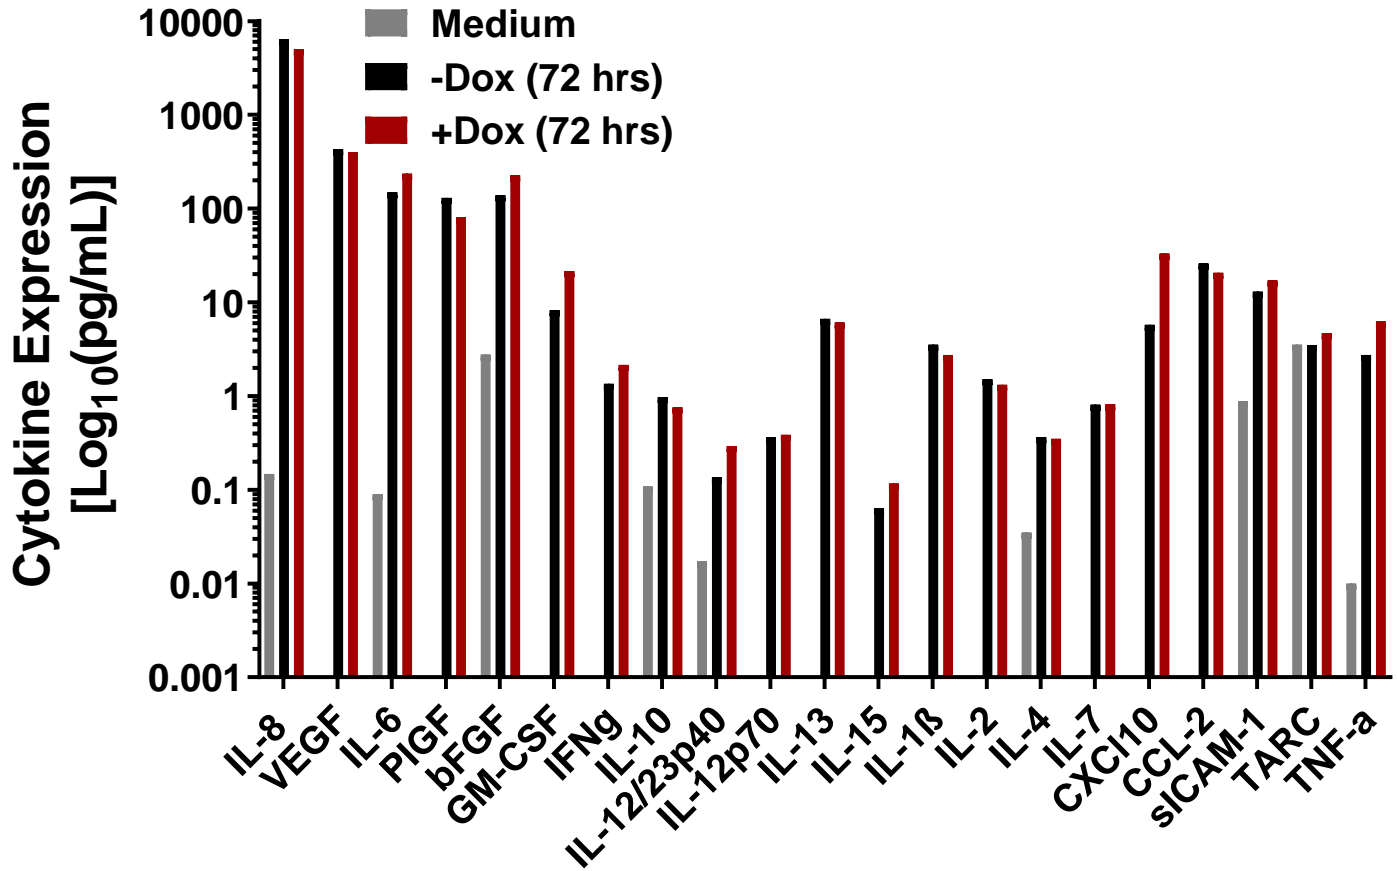

**Supplementary Figure 4.** BT549 TripZ-200c cells were treated  $\pm$  1.0  $\mu$ g/mL Dox for 72 hours to restore miR-200c. At this time point, conditioned medium from cells was harvested and analyzed via cytokine multiplex. Shown is the cytokine expression for all cytokines detected above baseline expression in medium alone (grey).

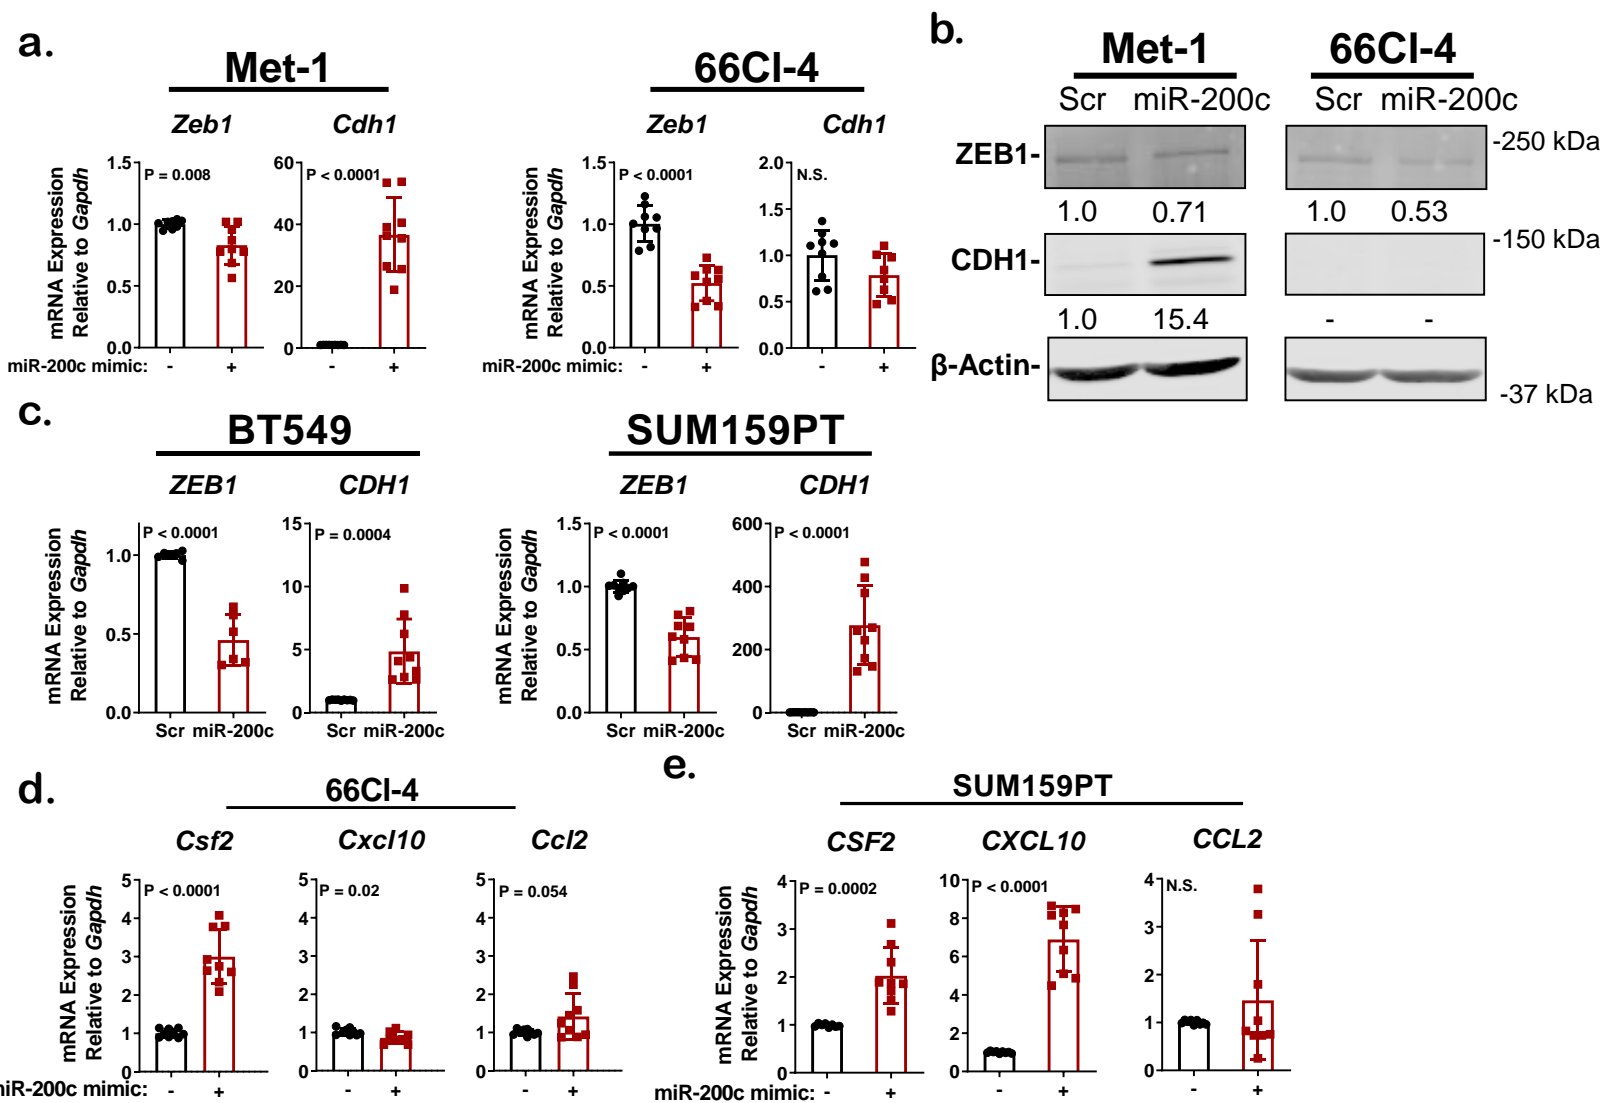

**Supplementary Figure 5. a-b.** Restoration of miR-200c was confirmed in Met-1 and 66CI-4 mammary carcinoma cells after 96 hours transient transfection with Scramble control (Scr) or miR-200c mimic (miR-200c) by qRT-PCR (a) and western blot analysis (b) for ZEB1 and CDH1. Densitometry was conducted using ImageJ and expression of ZEB1 and CDH1 was normalized to  $\beta$ -Actin. **c.** Restoration of miR-200c was confirmed in human TNBC BT549 and SUM159PT cells after 48 and 96 hours transient transfection, respectively, with Scr or miR-200c via qRT-PCR for ZEB1 and CDH1. **d-e.** mRNA expression of cytokines of interest were determined by qRT-PCR in 66CI-4 (d) and SUM159PT (e) cells after transient miR-200c restoration for 96 hours. All qRT-PCR data shown is the mean mRNA expression relative to *Gapdh* of 2-3 experiments conducted in triplicate  $\pm$  s.d., N = 6-9, Student's unpaired two-tailed t-test.

a.

## RAW264.7

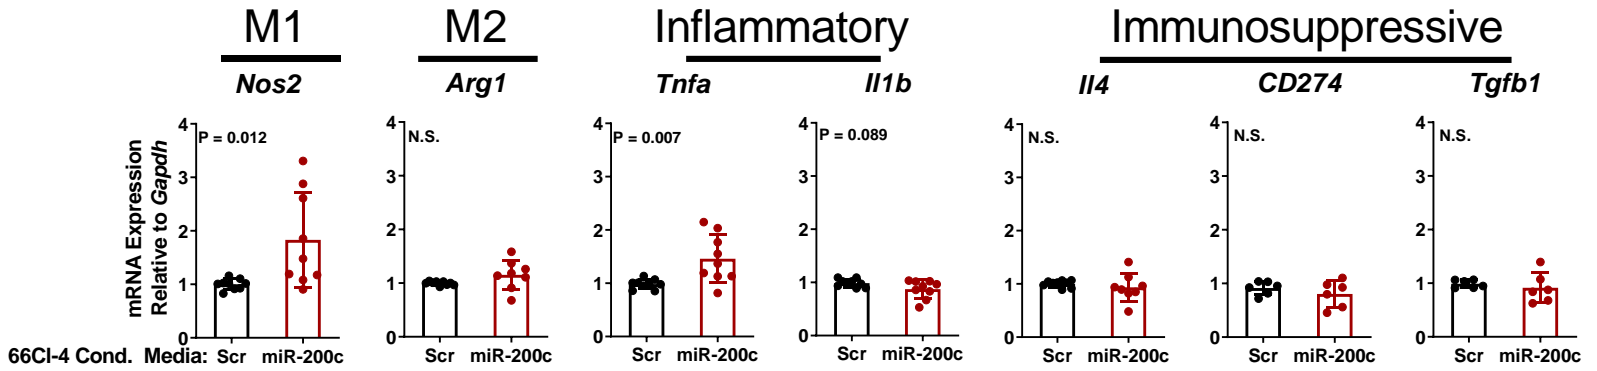

b.

## BMDM

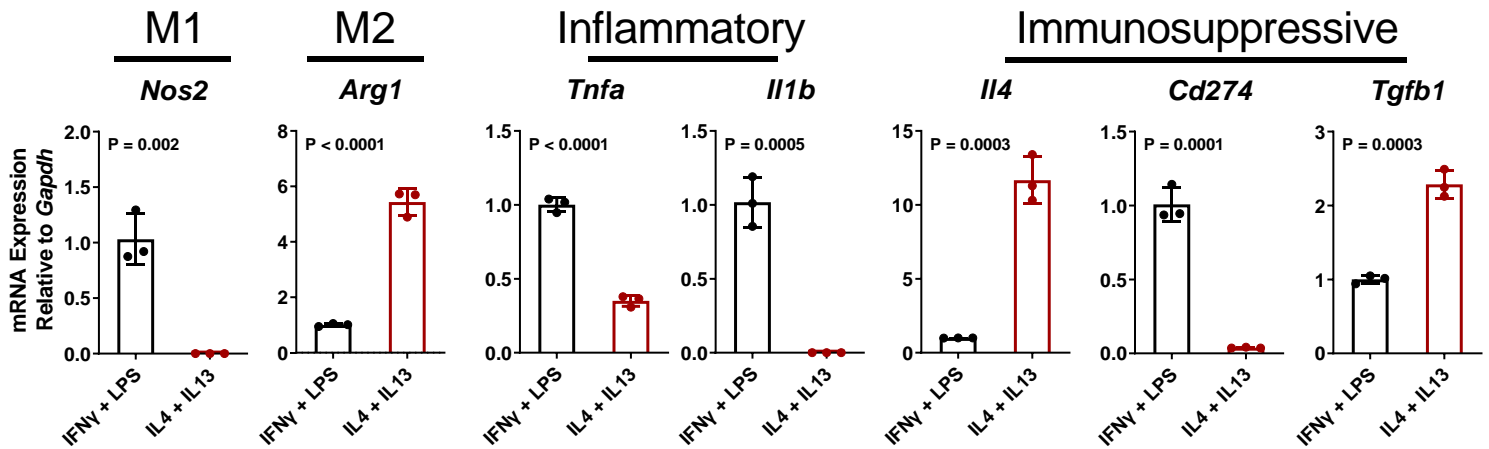

**Supplementary Figure 6. a.** 66Cl-4 cells were transiently transfected with Scramble control (Scr) or miR-200c mimic (miR-200c). After 96 hours, 66Cl-4 Scr or 66Cl-4 miR-200c conditioned medium (CM) was placed on RAW264.7 cells. At 48 hours culture with 66Cl-4 conditioned medium, macrophage polarization was determined via qRT-PCR for M1 (*Nos2* and pro-inflammatory cytokines: *Tnfa* and *Il1b*) and M2 (*Arg1* and immunosuppressive cytokines/markers: *Il4*, *Cd274*, *Tgfb1*) genes. Shown is the mean mRNA expression relative to *Gapdh* of 2-3 experiments conducted in triplicate  $\pm$  s.d., N = 6-9, Student's unpaired two-tailed t-test. **b.** Bone marrow-derived macrophages (BMDM) were cultured in the presence of 25 ng/mL M-CSF for 5 days at which time M2 macrophage polarization was induced via 20 ng/mL IL4 and 20 ng/mL IL13. BMDM were similarly cultured with 5 ng/mL GM-CSF for 5 days at which time M1 macrophage polarization was induced via 20 ng/mL IFN $\gamma$  and 100 ng/mL LPS. Macrophage polarization was confirmed on day 7 via qRT-PCR as in (a). Shown is the mean mRNA expression relative to *Gapdh* of an experiment conducted in triplicate  $\pm$  s.d., N = 3, Student's unpaired two-tailed t-test.

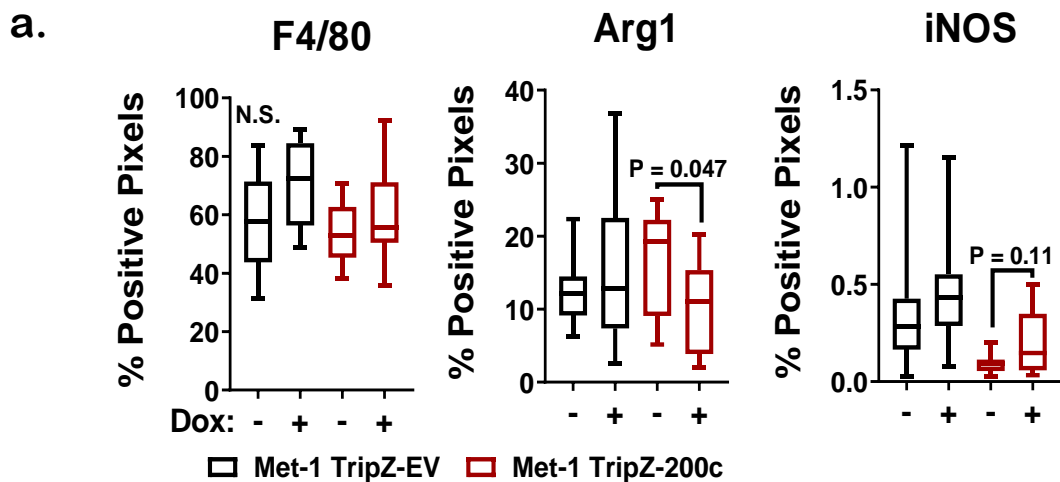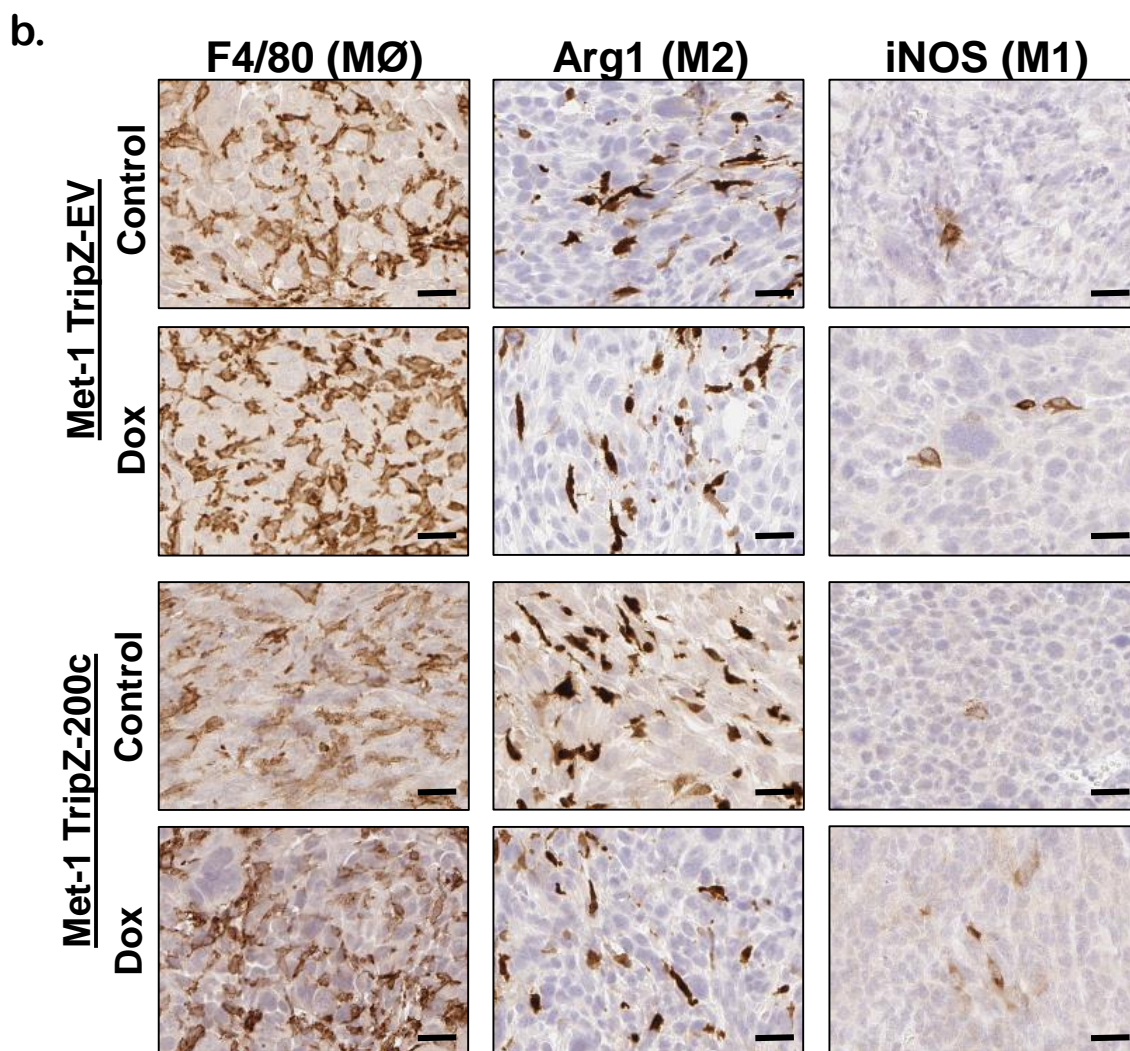

**Supplementary Figure 7. a-b.** IHC was conducted on Met-1 TripZ-EV and Met-1 TripZ-200c tumors. Quantification was done on the entirety of each tumor using the Aperio microscope and ImageScope software (**a**). Percent pixels are presented as a box plot with the center line representing the median, the box representing the 25<sup>th</sup> and 75<sup>th</sup> percentiles and the whiskers representing the minimum and maximum, N = 8-14, Student's unpaired two-tailed T-test. Representative images are shown (**b**), 10x, scale bar = 30  $\mu$ m.

a.

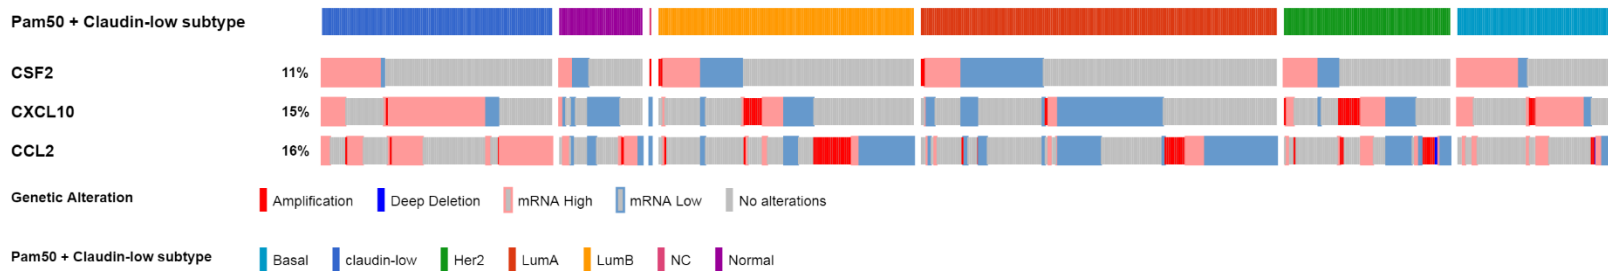

b.

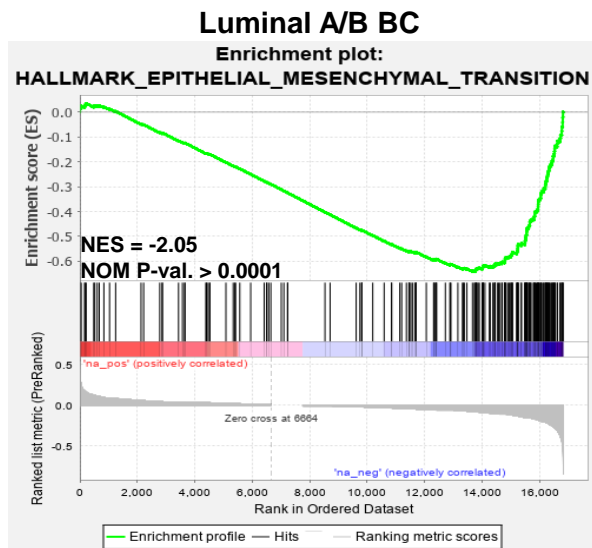

c.

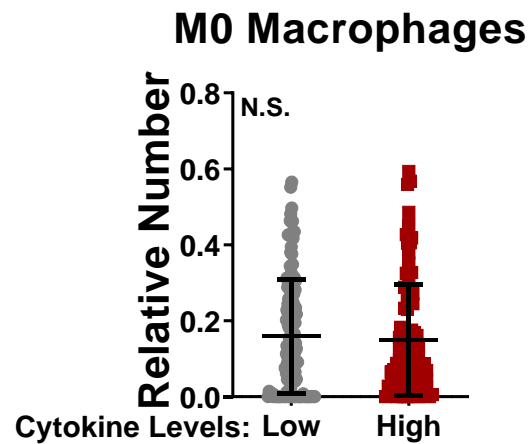

d.

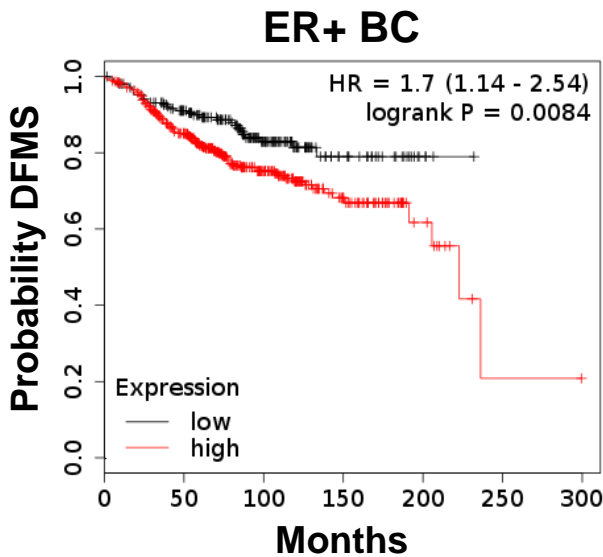

e.

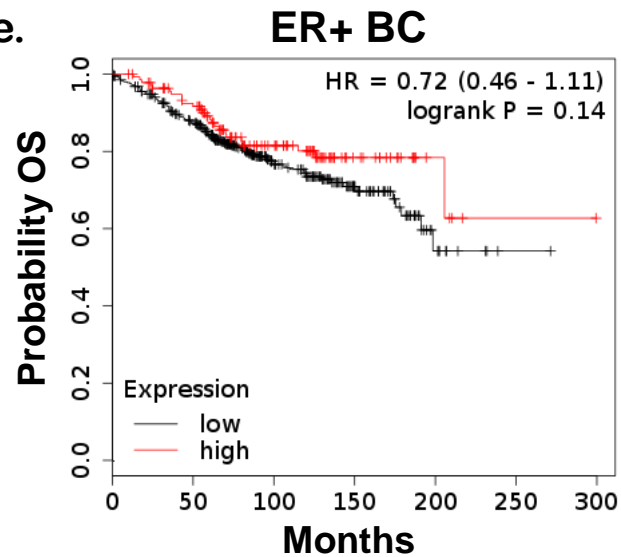

**Supplementary Figure 8.** a. Alterations in *CSF2* (GM-CSF), *CXCL10* and *CCL2* were determined using cBioportal (Nature 2012, METABRIC, Nature Communications 2016 datasets, z-score threshold  $\pm 1.5$ , N = 1904). Percentages denote the total percent of patients with alterations in each gene. b. Genes that were enriched with *CSF2*, *CXCL10* and *CCL2* alterations according to the Luminal A/B dataset in the TCGA (Nature 2012) were subjected to GSEA analysis (Hallmark), NES = normalized enrichment score, NOM p-val = nominal p-value. c. The Firehouse Legacy dataset (TCGA) was assessed for the relative number of immune infiltrates using CIBERSORT. Patients with expression of each *CSF2*, *CXCL10* and *CCL2* in the lowest quartile (Low, N = 92) or highest quartile (High, N = 132) were stratified via the relative number of unactivated macrophages (M0). Shown is the mean  $\pm$  s.d., Student's unpaired two-tailed t-test. d-e. KMplotter was used to stratify ER+ BC patients with high expression of *CSF2*, *CXCL10* and *CCL2* (red) based on disease free metastasis survival (DFMS, d, N = 664) and overall survival (OS, e, N = 2548).



Supplementary Figure 9. Uncropped western blot images from Figure 1b (a) and Supplementary Figure 5b (b).

a.

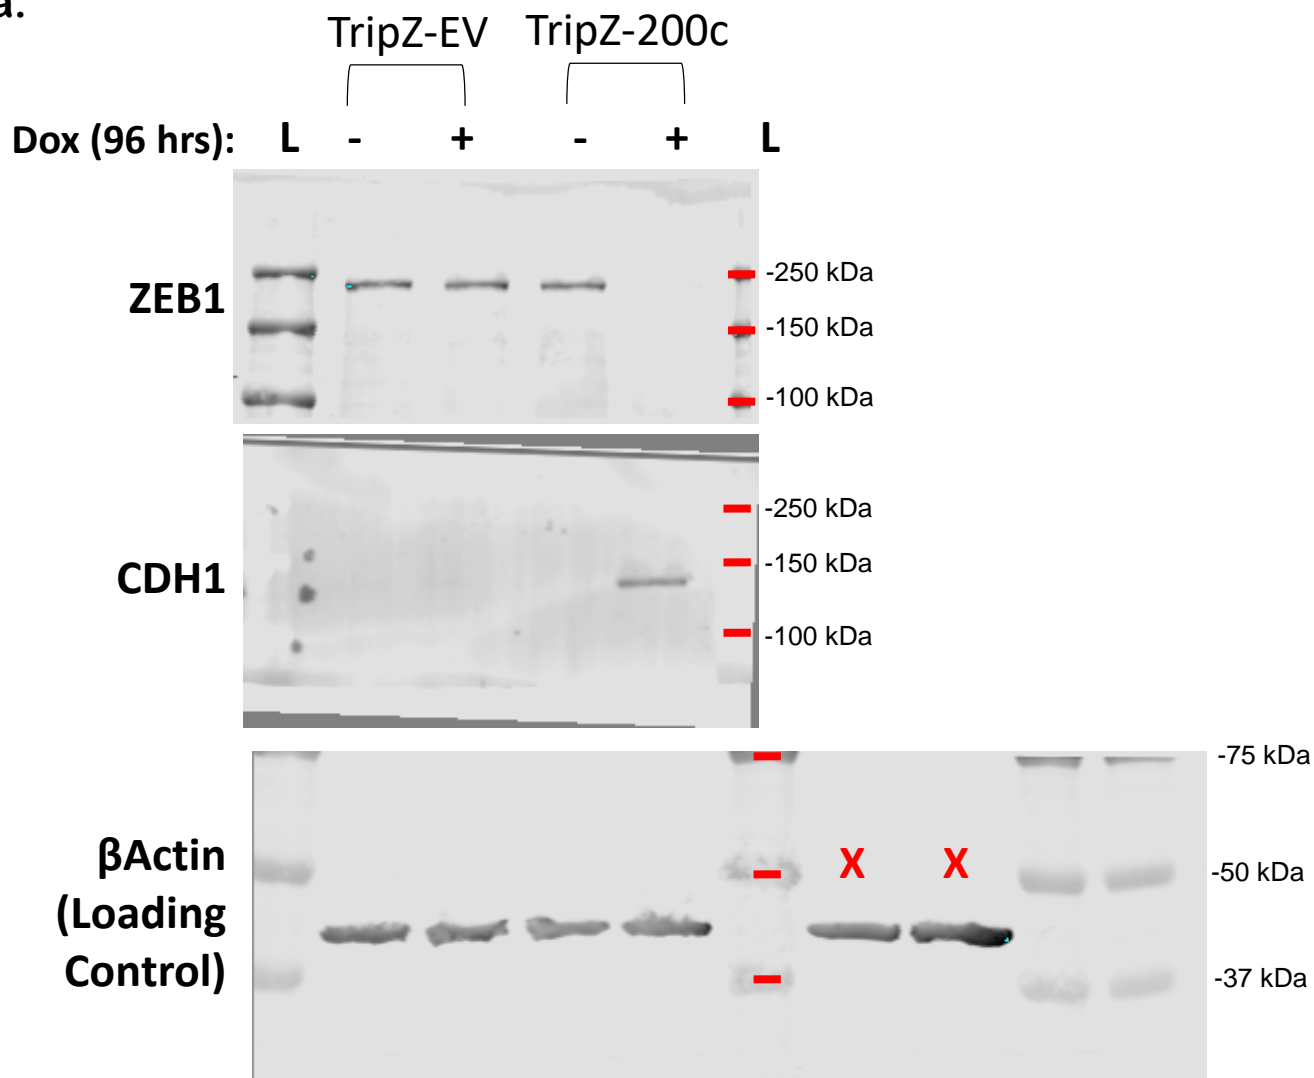

L = Ladder

X = Data outside of manuscript studies

b.

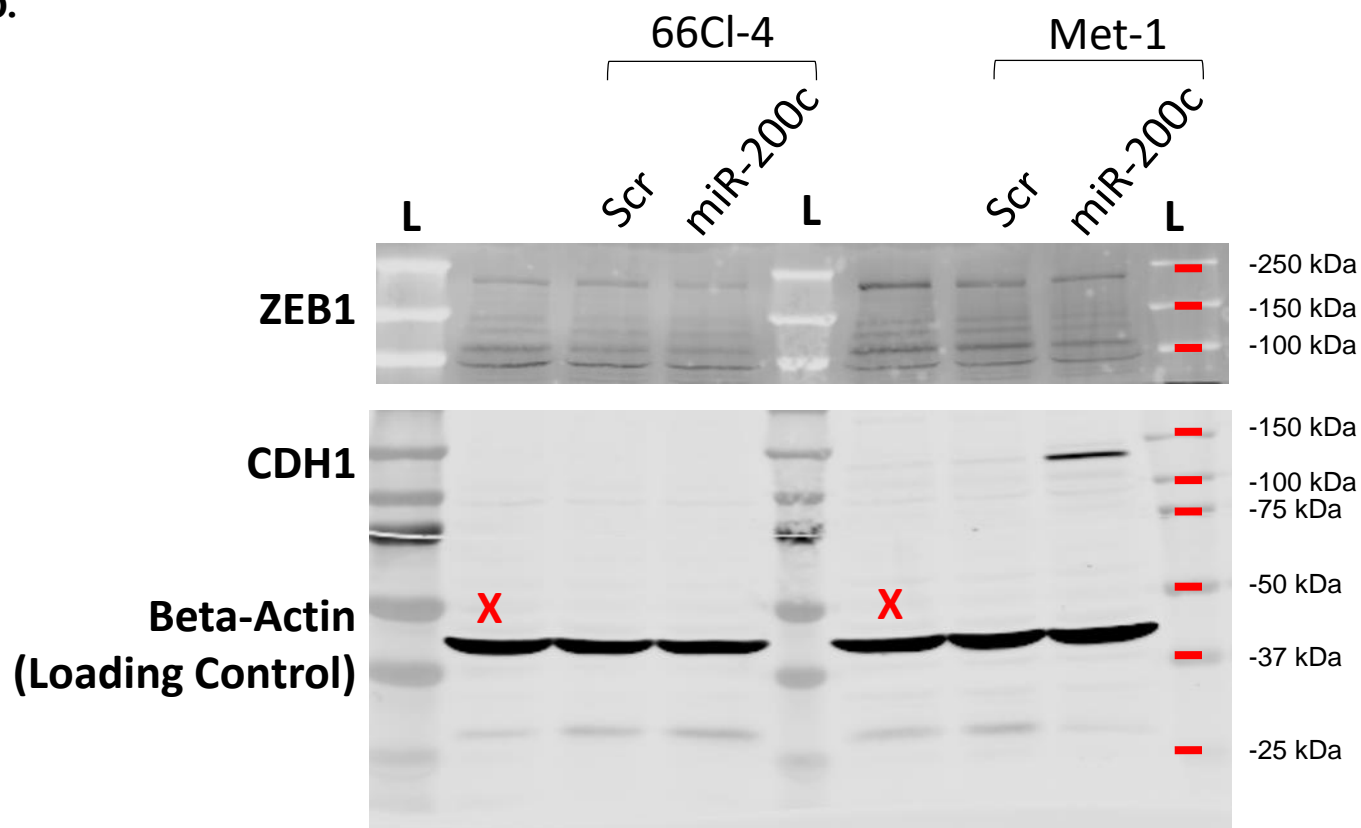

L = Ladder

X = Data outside of manuscript studies
